1 **Association between Use of Qingfei Paidu Tang and Mortality in**  
2 **Hospitalized Patients with COVID-19: A national retrospective**  
3 **registry study**

4

5 Lihua Zhang<sup>1\*</sup> PhD, Xin Zheng<sup>1\*</sup> PhD, Xueke Bai<sup>1</sup> MS, Qing Wang<sup>1</sup> MS, Bowang  
6 Chen<sup>1</sup> PhD, Haibo Wang<sup>2</sup> MPH, Jiapeng Lu<sup>1</sup> PhD, Shuang Hu<sup>1</sup> PhD, Xiaoyan Zhang<sup>1</sup>  
7 MS, Haibo Zhang<sup>1</sup> MD, Jiamin Liu<sup>1</sup> MD, Ying Shi<sup>3</sup> BMS, Zhiye Zhou<sup>3</sup> MS, Lanxia  
8 Gan<sup>3</sup> BE, Xi Li<sup>1,4¶</sup> PhD, Jing Li<sup>1,4,5¶</sup> PhD

9

10 <sup>1</sup> National Clinical Research Center for Cardiovascular Diseases, State Key

11 Laboratory of Cardiovascular Disease, Fuwai Hospital, National Center for

12 Cardiovascular Diseases, Chinese Academy of Medical Sciences and Peking Union

13 Medical College, Beijing, People's Republic of China

14 <sup>2</sup> Clinical Trial Unit, First Affiliated Hospital of Sun Yat-Sen University, Guangzhou

15 Province, People's Republic of China

16 <sup>3</sup> China Standard Medical Information Research Center, Shenzhen, People's Republic

17 of China

18 <sup>4</sup> Central China Subcenter of the National Center for Cardiovascular Diseases,

19 Zhengzhou, People's Republic of China

20 <sup>5</sup> Fuwai Hospital, Chinese Academy of Medical Sciences, Shenzhen, People's

21 Republic of China.

22 <sup>¶</sup>Joint first authors

23 ¶ Joint correspondence authors

24 Correspondence:

25 Jing Li, National Clinical Research Center for Cardiovascular Diseases, State Key

26 Laboratory of Cardiovascular Disease, Fuwai Hospital, National Center for

27 Cardiovascular Diseases, Chinese Academy of Medical Sciences and Peking Union

28 Medical College, Beijing, China. Electronic address: [jing.li@fwoxford.org](mailto:jing.li@fwoxford.org).

29

30 Xi Li, National Clinical Research Center for Cardiovascular Diseases, State Key

31 Laboratory of Cardiovascular Disease, Fuwai Hospital, National Center for

32 Cardiovascular Diseases, Chinese Academy of Medical Sciences and Peking Union

33 Medical College, Beijing, China. Electronic address: [xi.li@fwoxford.org](mailto:xi.li@fwoxford.org).

34

35

36 **Word count:** 2911 (not including the abstract, references, tables, boxes, or figure  
37 legends).

38 **Number of tables and figures:** 2 tables and 3 figures are included in this article.

39

40 **ABSTRACT**

41 **Background**

42 Qingfei Paidu Tang (QPT), a formula of traditional Chinese medicine, which was  
43 suggested to be able to ease symptoms in patients with Coronavirus Disease 2019  
44 (COVID-19), has been recommended by clinical guidelines and widely used to treat  
45 COVID-19 in China. However, whether it decreases mortality remains unknown.

46 **Purpose**

47 We aimed to explore the association between QPT use and in-hospital mortality  
48 among patients hospitalized for COVID-19.

49 **Study design**

50 A retrospective study based on a real-world database was conducted.

51 **Methods**

52 We identified patients consecutively hospitalized with COVID-19 in 15 hospitals  
53 from a national retrospective registry in China, from January through May 2020.  
54 Data on patients' characteristics, treatments, and outcomes were extracted from the  
55 electronic medical records. The association of QPT use with mortality was evaluated  
56 using Cox proportional hazards models based on propensity score analysis.

57 **Results**

58 Of the 8939 patients included, 28.7% received QPT. The crude mortality was 1.2%  
59 (95% confidence interval [CI] 0.8% to 1.7%) among the patients receiving QPT and  
60 4.8% (95% CI 4.3% to 5.3%) among those not receiving QPT. After adjustment for  
61 patient characteristics and concomitant treatments, QPT use was associated with a

62 relative reduction of 50% in in-hospital mortality (hazard ratio, 0.50; 95% CI, 0.37 to  
63 0.66  $P < 0.001$ ). This association was consistent across subgroups by sex and age.  
64 Meanwhile, the incidence of acute liver injury (8.9% [95% CI, 7.8% to 10.1%] vs.  
65 9.9% [95% CI, 9.2% to 10.7%]; odds ratio, 0.96 [95% CI, 0.81% to 1.14%],  $P$   
66 =0.658) and acute kidney injury (1.6% [95% CI, 1.2% to 2.2%] vs. 3.0% [95% CI,  
67 2.6% to 3.5%]; odds ratio, 0.85 [95% CI, 0.62 to 1.17],  $P = 0.318$ ) was comparable  
68 between patients receiving QPT and those not receiving QPT. The major study  
69 limitations included that the study was an observational study based on real-world  
70 data rather than a randomized control trial, and the quality of data could be affected  
71 by the accuracy and completeness of medical records.

## 72 **Conclusions**

73 QPT was associated with a substantially lower risk of in-hospital mortality, without  
74 extra risk of acute liver injury or acute kidney injury among patients hospitalized with  
75 COVID-19.

76 **Key words** Qingfei Paidu Tang; Mortality; COVID-19

## 77 **Abbreviations**

78 QPT: Qingfei Paidu Tang

79 COVID-19: Coronavirus Disease 2019

80 IQR: interquartile range

81 SMD: standard mean difference

82 IPTW: inverse probability treatment weighting

83 HR: hazard ratios

84 OR: odds ratios

85 CI: confidence interval

86

87

88 **Introduction**

89 Coronavirus Disease 2019 (COVID-19), caused by a novel severe acute respiratory  
90 syndrome coronavirus type 2 (SARS-CoV-2), has posed a huge threat to global health  
91 as the largest pandemic in a century. Nearly 50 million people worldwide have been  
92 infected, of whom over 1.2 million died by middle November 2020.<sup>1</sup> The pandemic is  
93 still evolving, effective treatments against COVID-19 are therefore urgently needed to  
94 reduce the mortality of COVID-19.

95 Qingfei Paidu Tang (QPT), a traditional Chinese medicine, was formulated on the  
96 basis of one of the classics of traditional Chinese medicine, Treatise on Febrile and  
97 Miscellaneous Diseases (*Shang Han Zabing Lun*).<sup>2</sup> It is a compound prescription  
98 containing four traditional Chinese medicine prescriptions, each of which has been  
99 widely applied as therapy of common cold, fever, influenza, and other virus  
100 infection.<sup>3-7</sup> Basic research also found that QPT possessed properties such as antiviral,  
101 <sup>8,9</sup> anti-inflammation, <sup>8-13</sup> and immune regulation,<sup>8,11-13</sup> which might be beneficial for  
102 patients with COVID-19. Moreover, several small observational studies in China have  
103 suggested its potential effectiveness in relieving symptom (i.e., fever and cough) and  
104 preventing disease progression in patients with COVID-19.<sup>14-17</sup> Therefore, QPT has  
105 been recommended in the Chinese guidelines for the treatment of Coronavirus  
106 Disease 2019 (COVID-19) since early February 2020 and widely used in China.<sup>18</sup>  
107 However, it is unknown whether it could reduce the mortality of COVID-19.

108 Accordingly, using the data from a national retrospective registry, we sought to  
109 evaluate the effectiveness and safety of QPT in COVID-19. Specifically, we

110 hypothesized that QPT use would be associated with a lower risk of in-hospital  
111 mortality in patients with COVID-19, and tested it using propensity score analysis.  
112 We also assessed whether there was an association of QPT with the incidence of acute  
113 liver injury and acute renal injury during hospitalization.

114

## 115 **Methods**

### 116 **Data Sources**

117 In a government-mandated national registry, hospitalizations for COVID-19 in all the  
118 designated hospitals across China were registered retrospectively. Information relating  
119 to patient characteristics, treatments, and outcomes, in the electronic medical records  
120 (EMR), were required to be submitted to a system deployed by the National Health  
121 Commission of China, in forms of either structured database for the front page, or  
122 unstructured text for the progress notes, lab test results, and physician's orders. By the  
123 date of May 6<sup>th</sup> 2020, over 40 thousand COVID-19 cases from more than five  
124 hundred hospitals have been included.

### 125 **Ethical approval**

126 The Ethics Committee at the the National Center for Cardiovascular Diseases  
127 (NCCD)/Fuwai Hospital ethics committee approved this study and the Ethics  
128 Committee at the First Affiliated Hospital, Sun Yat-sen University approved the  
129 current analysis. Informed consent of individual patients was waived.

130

131 **Study cohort**

132 Among all the designated hospitals providing inpatient care for COVID-19 in the  
133 national registry, we excluded hospitals that were ineligible for data extraction or  
134 analysis for the following two reasons. First, the number of patients hospitalized with  
135 COVID-19 was less than 100. Second, the number of patients receiving QPT in the  
136 hospitals was less than 50. In the end, 15 hospitals were included in our study, all of  
137 which were located in Hubei province.

138 Among eligible hospitals, we included all patients aged  $\geq 18$  years discharged  
139 between January and May, 2020 with a confirmed diagnosis of COVID-19. We  
140 identified these patients, according to International Classification of Diseases, Clinical  
141 Modification codes revision 10 (U07.100, U07.100.00x, U07.100.00x001,  
142 U07.100.00x002, U07.100.00x003), when available, or through principal diagnosis  
143 terms noted at discharge. We excluded patients who were transferred out, since the  
144 records of their hospitalizations were truncated. Patients who died or were discharged  
145 within 24 hours of admission were also excluded from the analysis, because the  
146 testing and treatments for them were likely to be influenced due to the short length of  
147 hospital stay.

148 **Data Extraction**

149 For each patient, the demographic characteristics (age and sex), prior medical  
150 histories/comorbidities (hypertension, diabetes, coronary heart disease, stroke, chronic  
151 kidney diseases, chronic obstructive pulmonary disease, and cancer), clinical status at  
152 admission (critical or not), and in-hospital death was obtained from the front-page



153 database or progress notes. The vital signs (heart rate, blood pressure, and respiratory  
154 rate) at admission were extracted from the progress notes. The in-hospital medications  
155 (QPT, Arbidol, Ribavirin, Oseltamivir, Ganciclovir, Lopinavir, Lianhuaqingwen,  
156 Xuebijing, Diammonium Glycyrrhizinate, Methylprednisolone, Dexamethasone, and  
157 Interferon) were extracted from the physician orders, progress notes, and nurse  
158 records. The in-hospital acute liver injury and acute kidney injury were identified  
159 based on the front-page database, progress notes, and lab test results.

160 We searched predefined keywords in unstructured text of the submitted medical  
161 records using Python software (version 3.6) and MYSQL software (version 8.0), in  
162 order to extract the data. Particularly, research clinicians randomly selected and  
163 reviewed 5% of the medical records in the hospitals with QPT use rate under 20%, to  
164 ensure the exhaustion of synonyms of this medication and completeness of data  
165 extraction. Furthermore, to ensure the data accuracy, research clinicians adjudicated  
166 the prior medical history/comorbidities based on the progress note.

### 167 **Treatment and outcome measures**

168 As the treatment of interest in our analysis, QPT use was defined as receiving this  
169 medication for no less than three days during the hospitalization, according to the  
170 Chinese diagnosis and treatment protocol for COVID-19 (Trial Version 6) (i.e., one  
171 formula a day, three formulas were defined as a course of treatment).<sup>18</sup>

172 Correspondently, the study cohort was categorized into two treatment groups –  
173 patients receiving QPT and those not receiving QPT. Meanwhile, we also explored  
174 the effectiveness and safety of QPT between patients who ever received QPT during

175 hospitalization and those who did not.

176       The outcome measure of effectiveness was in-hospital mortality. The outcome  
177 measure of safety included acute liver injury and acute kidney injury during  
178 hospitalization. Acute liver injury was defined as documented acute liver injury, acute  
179 liver renal insufficiency, acute liver failure, hepatic encephalopathy, or hepatic coma,  
180 then adjudicated based on the elevation in aspartate aminotransferase, alanine  
181 aminotransferase, or total bilirubin. Acute renal injury was defined as documented  
182 acute renal failure, acute renal injury, or acute renal insufficiency, then adjudicated  
183 based on the elevation in serum creatinine.

#### 184 **Statistical analysis**

185 We described participant characteristics, treatments, and outcomes, with frequencies  
186 and percentages for categorical variables, while means  $\pm$  standard deviations or  
187 median with interquartile range (IQR) for continuous variables. The difference  
188 between groups was estimated by standard mean difference (SMD), and absolute  
189 values less than 0.1 was considered small differences.<sup>19</sup>

190       We conducted a statistical power analysis in advance, based on the projected  
191 sample size of this retrospective registry. Assuming the in-hospital mortality rate was  
192 4% in patients not receiving QPT, a total sample size of 9000 can achieve a statistical  
193 power of 80% at a 2-sided 0.05 significance level to detect a hazard ratio of 0.7 or  
194 below, for the treatment with a 30% or greater prevalence.

195       We used inverse probability treatment weighting (IPTW) based on probability of  
196 receiving treatment to make the characteristics between the two treatment groups

197 comparable. The probability of receiving QPT was estimated by multilevel logistic  
198 regression that adjusted for baseline characteristics including demographics,  
199 comorbidities, and prior histories extracted in previous referred (Table S1), with  
200 hospital as random effect.

201 To assess the effectiveness of QPT, we obtained hazard ratios (HR) between  
202 treatment groups with developing frailty proportional hazards models on in-hospital  
203 death, accounted hospital as random effect, adjusted for other in-hospital medications,  
204 and weighted with inverse probability of QPT use. We then plotted Kaplan-Meier  
205 curve in patients receiving and those not receiving QPT. To assess the safety of QPT,  
206 we obtained odds ratios (OR) with the multilevel logistic regression on acute liver  
207 injury and acute renal injury, which handled random effect, adjustment, and weight,  
208 using the similar approaches described earlier. We also added interaction items to  
209 explore the heterogeneity of effectiveness across subgroups by age (<60, 60-69, or  $\geq$   
210 70 years), sex (male or female), and prior medical history/comorbidities (with any or  
211 without). In each subgroup, we recalculated inverse probability and reweighting  
212 separately, as aforementioned.

213 We conducted two sensitivity analysis. First, we matched propensity score  
214 between patients receiving and not receiving QPT using the nearest-neighbour method,  
215 to create two groups with similar characteristics and sample size. Second, we added  
216 the propensity score as covariate in the frailty model without weighting, to account for  
217 the difference between treatment groups.

218 In the submitted medical records, small proportions of blood pressure (1.7%),

219 heart rate (0.1%), and respiratory rate (0.2%) were missing. Assuming that these data  
220 were missing at random, we applied a multiple imputation method based on Markov  
221 Chain Monte Carlo by PROC MI procedure in SAS to impute missing value.<sup>20</sup>

222 Two-tailed P values were reported with  $P < 0.05$  considered to indicate statistical  
223 significance. All statistical analyses were performed with SAS software, version 9.4  
224 (SAS Institute, Cary, NC).

225

## 226 **Results**

### 227 **Study Participants**

228 There were 9115 patients with COVID-19 admitted to the 15 designated hospitals in  
229 this study, with the numbers of cases in each included hospital ranging from 140 to  
230 1856. After excluding 96 patients with age  $< 18$  years, 66 patients transferred out, and  
231 14 patients with the length of stay less than 24 hours, 8939 eligible cases were  
232 included in the analysis (Figure 1). Of them, the average age was  $55.9 \pm 15.6$  years,  
233 and 53.4% (4771) were women. 4.4% (390) patients were at critical state at admission,  
234 while 33.7% (3016) had hypertension, and 15.2% (1357) had diabetes.

235 Of these patients, 2833 (31.7%) ever received QPT during hospitalization, with a  
236 median treatment duration of 6 (4 to 9) days. Half of the QPT users received the first  
237 formula within 5 days after hospitalization. The timing of QPT use after  
238 hospitalization was shown in Figure S1.

239 In the study cohort, 2568 patients (28.7%) received QPT for no less than 3 days  
240 and 6371 (71.3%) did not. The patient characteristics of the two treatment groups

241 were provided in Table 1. Unweighted comparisons showed that patients who  
242 received QPT were younger (SMD>0.1). After adjustment for inverse probability of  
243 treatment weighting, all covariates were well balanced (i.e., standardized mean  
244 differences were <0.1). The distributions of inverse probability score weights of  
245 treatment groups were shown separately in Figure S2.

## 246 **Outcomes**

247 During hospitalization with a median length of stay of 15 (9 to 21) days, 334 (3.7%)  
248 patients died. The crude mortality was 1.2% (95% confidence interval [CI], 0.8% to  
249 1.7%) among patients who received QPT and 4.8% (95% CI, 4.3% to 5.3%) among  
250 patients who did not (Figure 2). In the unadjusted analysis, patients who received QPT  
251 were less likely to die than patients who did not receive QPT (hazard ratio, 0.17; 95%  
252 CI, 0.11% to 0.26%,  $P<0.001$ ). In the Cox model with inverse propensity score  
253 weighting, all covariates in the Cox model were shown in Table S2. QPT use was  
254 associated with a lower mortality risk (adjusted hazard ratio, 0.50; 95% CI, 0.37 to  
255 0.66,  $P<0.001$ ).

256 In terms of sex and age, no significant differences were observed among their  
257 subgroups in the associations between QPT treatment and in-hospital mortality (all  $P$   
258 for interaction>0.05). Although significant heterogeneity in associations between QPT  
259 treatment and in-hospital mortality were detected between subgroups by prior medical  
260 history/comorbidities status ( $P$  for interaction=0.020), the significantly lower  
261 mortality risk for patient receiving QPT was observed in both these subgroups (Figure  
262 3).

263           Regarding the safety of QPT, patients who received QPT had a comparable  
264 incidence of acute hepatic injury (crude rate, 8.9% [95% CI, 7.8% to 10.1%] vs 9.9%  
265 [95% CI, 9.2% to 10.7%]; adjusted OR, 0.96 [95% CI, 0.81 to 1.14],  $P=0.658$ ) and  
266 acute kidney injury (crude rate, 1.6% [95% CI, 1.2% to 2.2%] vs. 3.0% [95% CI, 2.6%  
267 to 3.5%]; adjusted OR, 0.85 [95% CI, 0.62 to 1.17],  $P=0.318$ ), in comparison with  
268 those who did not.

269           Furthermore, we also conducted the analysis of the effectiveness and safety of  
270 QPT between patients who ever received QPT during hospitalization and those who  
271 did not, and found similar results with those mentioned above (Table S3-4 ).

## 272 **Sensitivity Analyses**

273 In addition to the IPTW analysis, we matched 3492 patients based on their propensity  
274 score (1746 patients receiving QPT and 1746 patients not receiving QPT). The two  
275 groups were well-balanced in characteristics and concomitant treatments (Table S5,  
276 Figure S3 ). The risk of mortality in patients who received QPT was significantly  
277 lower than in those who did not receive QPT (1.1% [95% CI, 0.7% to 1.7%] vs 2.7%  
278 [95% CI, 2.0% to 3.6%], HR, 0.42; 95%CI, 0.24 to 0.74;  $P=0.002$ ) (Table 2 and  
279 Figure S4 ). In the meantime, patients receiving QPT had a comparable incidence of  
280 acute kidney injury (1.1% [95% CI, 0.7% to 1.8%] vs. 1.9% [95% CI, 1.3% to 2.6%];  
281 OR, 0.74 [95% CI, 0.40 to 1.35],  $P=0.327$ ) compared with the patients who did not,  
282 but a lower risk of acute liver injury (5.4% [95% CI, 4.4% to 6.5%]vs. 8.1% [95% CI,  
283 6.9% to 9.5%]; OR, 0.72 [95% CI, 0.54 to 0.96],  $P=0.025$ ).

284           We also included the propensity score as an additional covariate in the models, in

285 which patients who received QPT had a significantly lower risk of mortality than  
286 those who did not receive QPT (adjusted HR, 0.24 95% CI, 0.15 to 0.37;  $P < 0.001$ ).  
287 Meanwhile, patients receiving QPT had comparable incidence of acute liver injury  
288 (OR, 0.93 [95% CI, 0.76 to 1.14],  $P = 0.497$ ) and acute kidney injury (OR, 0.74 [95%  
289 CI, 0.50 to 1.10],  $P = 0.133$ ) compared with the patients not receiving QPT.

290

## 291 **DISCUSSION**

292 In this analysis based on a national registry of hospitalized patients with COVID-19,  
293 we first demonstrated that QPT use was associated with halving the risk of in-hospital  
294 mortality, without significant increase in risk of adverse effects, such as acute liver  
295 injury or acute kidney injury. Our findings have provided new evidence and insights  
296 regarding the treatment of COVID-19.

297 Our study has extended the literature on the effectiveness of QPT for patients  
298 with COVID-19. First, this is the first study assessing the association between the  
299 QPT use and in-hospital mortality that is considered the most important and objective  
300 outcome metrics, rather than surrogate indicators widely used before. Second, in  
301 comparison with prior studies in China about QPT for COVID-19 treatment,<sup>14-17</sup> our  
302 study has involved an over ninety-time larger sample size that ensured sufficient  
303 statistical power even for subgroup analysis. Third, using various propensity score  
304 approaches, we established control groups to enable appropriate comparisons in both  
305 effectiveness and safety of QPT. Forth, this national registry included consecutive  
306 patients from multiple Chinese hospitals, which represented the use and effectiveness

307 of QPT in real-world practice.

308       The effects of QPT on decreasing mortality of COVID-19 observed in our study  
309 are supported by the mechanisms shown in prior experimental studies, which  
310 included antiviral,<sup>8,9</sup> anti-inflammation,<sup>8-13</sup> immune regulation,<sup>8,11-13</sup> regulating  
311 metabolism,<sup>9,12</sup> anti-platelet aggregation,<sup>10</sup> and organ protection.<sup>11,13</sup> QPT was  
312 composed of four traditional Chinese medicine prescriptions, which were shown to  
313 be separately effective in antiviral,<sup>3,5</sup> anti-inflammatory,<sup>7</sup> or immuno-modulating.<sup>6</sup>  
314 QPT has multiple components acting on the multiple pathways. Some studies  
315 employed molecular network and network pharmacology to analyse the ingredients  
316 of QPT, and found that the key active ingredients, including quercetin, luteolin,  
317 kaempferol, naringenin, and isorhamnetin, could alleviate excessive immune  
318 responses, by regulating the function of cytokines related pathways, such as tumour  
319 necrosis factor signalling pathways and mitogen-activated protein kinases signalling  
320 pathways.<sup>11-13</sup> Further research is needed to fully investigate the underlying  
321 mechanism of the effect of QPT.

322       In this study, we did not observe the elevated risk of acute liver injury or acute  
323 kidney injury among patients receiving QPT. This is consistent with the previous  
324 observational studies.<sup>14-17</sup> Moreover, our findings are particularly reassuring given the  
325 complexity in comorbidities (such as hypertension, diabetes and chronic kidney  
326 disease) and concomitant treatments (such as antivirals, corticosteroids and  
327 immunomodulators) observed in our cohort. Nevertheless, long-term safety related to  
328 QPT still needs to be verified in future studies.



329           This study has provided valuable evidence and prospects for the treatment of  
330 COVID-19. Currently, there are globally nearly 7.5 million active cases that need  
331 treatments.<sup>1</sup> However, there is no evidence about any medication that could decrease  
332 mortality in COVID-19 except for dexamethasone, which has been proved to be able  
333 to reduce the 28-day mortality in those who received mechanical ventilation or  
334 oxygen alone.<sup>21,22</sup> To the best of our knowledge, this is the first study implying that  
335 QPT could reduce the mortality risk of patients with COVID-19. Our findings were  
336 consistent across subgroups, and robust regardless of analytic methods. It is  
337 encouraging that the use of QPT can probably prevent tens of thousands of deaths, if  
338 our findings are further confirmed and applied globally.

### 339 **Limitations**

340           The results of our study should be interpreted in the context of several limitations.  
341 First, due to the nature of observational study, we cannot exclude the influence of  
342 residual confounders. However, after the IPTW, patients who received QPT had  
343 higher rates of co-morbidities which was positively related to mortality risk,  
344 compared with those who did not received QPT. Thus, the effectiveness we observed  
345 tended to be conservative. Second, our study was based on real-world data and the  
346 quality of data could be affected by the accuracy and completeness of medical records.  
347 Therefore, we only included the highly reliable variables on patient characteristics,  
348 treatments, and outcomes in the analysis. Third, our study merely collected in-hospital  
349 outcomes, therefore, we could not evaluate the long-term effectiveness and safety.  
350 Finally, all the patients in our study were from China, and the beneficial effects of

351 QPT in other racially diverse populations still await further validation.

352 **Conclusion**

353 Among the patients hospitalized for COVID-19, the use of QPT was associated with  
354 halving the risk of mortality, without raising the risk of acute liver injury or acute  
355 kidney injury. Further validation with randomized controlled trials is needed to  
356 support the use of QPT worldwide for COVID-19.

357

358

359

360 **Declarations**

361 **Ethics approval**

362 The Ethics Committee at the First Affiliated Hospital, Sun Yat-sen University  
363 approved the current analysis. Informed consent of individual patients was waived.

364 **Consent for publication**

365 Not applicable

366 **Availability of data and materials**

367 The data sharing needs to be approved by national registry, which is under the  
368 supervision of National Health commission. However, on site data audit is allowed  
369 under current regulation.

370 **Competing interests**

371 Dr Li reported receiving research grants, through Fuwai Hospital, from the People's  
372 Republic of China for work to improve the management of hypertension and blood lipids

373 and to improve care quality and patient outcomes of cardiovascular disease; receiving  
374 research agreements, through the National Center for Cardiovascular Diseases and Fuwai  
375 Hospital, from Amgen for a multicenter clinical trial assessing the efficacy and safety of  
376 omecamtiv mecarbil and for dyslipidemic patient registration; receiving a research  
377 agreement, through Fuwai Hospital, from Sanofi for a multicenter clinical trial on the effects  
378 of sotagliflozin; receiving a research agreement, through Fuwai Hospital, with the  
379 University of Oxford for a multicenter clinical trial of empagliflozin; receiving a research  
380 agreement, through the National Center for Cardiovascular Diseases, from AstraZeneca for  
381 clinical research methods training outside the submitted work; and receiving a research  
382 agreement, through the National Center for Cardiovascular Diseases, from Lilly for  
383 physician training outside the submitted work. No other disclosures were reported.

#### 384 **Funding**

385 This project was supported by the Chinese Academy of Medical Sciences  
386 Innovation Fund for Medical Science (2020-I2M-Cov19-003) and the National  
387 Natural Science Foundation of China under Grants (No. U1611261). The funder of  
388 the study had no role in study design, data collection, data analysis, data  
389 interpretation, or writing of the report.

#### 390 **Authors' contributions**

391 JL and XL conceived of the project and take responsibility for all aspects of it. JL and  
392 XL designed the study. LHZ and XZ wrote the first draft of the manuscript, with  
393 further contributions from JPL, XKB, HBZ, JML, BWC, QW, XYZ, HS, HBW, YS,  
394 ZYZ and LXG. XKB and SH did the statistical analysis. YZW, ZYZ, ESS, WQ,  
395 BWC, YS and XYZ collected, extracted, processed, and cleaned the data. All authors

396 have read and approved the submission of this review, which neither has been  
397 published on any other peer-review platforms, nor is being considered for publication  
398 elsewhere, in whole or in part, in any language.

399 **Acknowledgements**

400 We appreciate the Bureau of Medical Administration and Medical Service  
401 Supervision, National Health Commission of China, for the approval and support on  
402 collecting data. We appreciate all the COVID-19 designated hospitals for submitting  
403 medical records, and China Standard Medical Information Research Center for the  
404 support in collecting and processing data. We appreciate the team in National Center  
405 for Cardiovascular Diseases for their multiple contributions in data cleaning and  
406 manuscript coordinating.

407

408

409

410

411

412

413

414

415 **REFERENCES**

- 416 1. World Health Organization. Coronavirus disease (COVID-19) pandemic.  
417 <https://www.who.int/emergencies/diseases/novel-coronavirus-2019>. Accessed Nov 15 2020
- 418 2. National Administration of Traditional Chinese Medicine.  
419 <http://www.satcm.gov.cn/hudongjiaoliu/guanfangweixin/2020-03-05/13622.html>. Accessed Sep 22  
420 2020
- 421 3. Shi KY, Han GX, Zhang WW, et al. Systematic Evaluation of Xiaochaihu Decoction Combined  
422 with Antiviral Agent in the Treatment of Chronic Hepatitis B. *Evaluation and Analysis of Drug-Use*  
423 *in Hospitals of China*. 2019; 19: 1039-1050.
- 424 4. Zheng CS, Wu YS, Bao HJ, et al. Understanding the polypharmacological anticancer effects of  
425 Xiao Chai Hu Tang via a computational pharmacological model. *Exp Ther Med*. 2014; 7: 1777-1783..
- 426 5. Hsieh CF, Lo CW, Liu CH, et al. Mechanism by which ma-xing-shi-gan-tang inhibits the entry  
427 of influenza virus. *J Ethnopharmacol*. 2012;143:57-67.
- 428 6. Lin CC, Wang YY, Chen SM, et al. Shegan-Mahuang Decoction ameliorates asthmatic airway  
429 hyperresponsiveness by downregulating Th2/Th17 cells but upregulating CD4+FoxP3+ Tregs. *J*  
430 *Ethnopharmacol*. 2020; 253: 112656.
- 431 7. Yang Y, Zhang DM, Liu JH, et al. Wuling San protects kidney dysfunction by inhibiting renal  
432 TLR4/MyD88 signaling and NLRP3 inflammasome activation in high fructose-induced  
433 hyperuricemic mice. *J Ethnopharmacol* 2015; 169: 49-59.
- 434 8. Zhao J, Tian SS, Yang J, et al. Investigating the mechanism of Qing-Fei-Pai-Du-Tang for the  
435 treatment of Novel Coronavirus Pneumonia by network pharmacology. *Chinese Traditional and*  
436 *Herbal Drugs* 2020; 51: 829-835.
- 437 9. Chen J, Wang Y-k, Gao Y, et al. Protection against COVID-19 injury by qingfei paidu decoction  
438 via anti-viral, anti-inflammatory activity and metabolic programming.  
439 *Biomed Pharmacother* 2020; 129: 110281.
- 440 10. Yang R, Liu H, Bai C, et al. Chemical composition and pharmacological mechanism of Qingfei  
441 Paidu Decoction and Ma Xing Shi Gan Decoction against Coronavirus Disease 2019 (COVID-19): In  
442 silico and experimental study. *Pharmacol Res* 2020; 157: 104820.
- 443 11. Xu DY, Xu YL, Wang ZW, et al. Mechanism of Qingfei Paidu decoction on COVID-19 based  
444 on network pharmacology. *Pharmacol Clin Chin Materia Med* 2020; 36: 26-31.
- 445 12. Xu TF, He CG, Yang K. Network pharmacology-based study on material basis and mechanism  
446 of Qingfei Paidu Decoction against Novel coronavirus pneumonia. *Natural Product Research and*  
447 *Development* 2020, <http://kns.cnki.net/kcms/detail/51.1335.Q.20200413.1918.018.html>. Accessed  
448 Sep 2 2020
- 449 13. Wu H, Wang JQ, Yang YW, et al. Preliminary exploration of the mechanism of Qingfei Paidu  
450 decoction against novel coronavirus pneumonia based on network pharmacology and molecular  
451 docking technology. *Acta Pharmaceutica Sinica* 2020; 55: 374–383.
- 452 14. Wang R, Yang SJ, Xie C, et al. Clinical efficacy of Qingfei Paidu Decoction in the treatment of  
453 COVID-19. *Pharmacology and Clinics of Chinese Materia Medica* 2020; 36: 13-18.
- 454 15. Zhang LJ, Fan H, Chen R, et al. Rational usage of Qingfei Paidu Decoction from clinical  
455 practice. *Journal of Traditional Chinese Medicine* 2020. Available from:  
456 <http://kns.cnki.net/kcms/detail/11.2166.R.20200326.1355.002.html>. Accessed Sep 2 2020
- 457 16. Li KY, An W, Xia F, et al. Observation on clinical effect of modified Qingfei Paidu Decoction in

- 458 treatment of COVID-19. *Chinese Traditional and Herbal Drugs* 2020; **51**: 2046-9.
- 459 17. Xin SY, Cheng XQ, Zhu B, et al. Clinical retrospective study on the efficacy of Qingfei Paidu  
460 decoction combined with Western medicine for COVID-19 treatment. *Biomed Pharmacother* 2020;  
461 129: 110500.
- 462 18. National Health Commission of the People's Republic of China. Diagnosis and Treatment  
463 Protocol for COVID-19 (Trial Version 6.0). 2020. Available from:  
464 [http://www.nhc.gov.cn/yzygj/s7653p/202002/8334a8326dd94d329df351d7da8aefc2/files/b218cfeb1b](http://www.nhc.gov.cn/yzygj/s7653p/202002/8334a8326dd94d329df351d7da8aefc2/files/b218cfeb1bc54639af227f922bf6b817.pdf)  
465 [c54639af227f922bf6b817.pdf](http://www.nhc.gov.cn/yzygj/s7653p/202002/8334a8326dd94d329df351d7da8aefc2/files/b218cfeb1bc54639af227f922bf6b817.pdf). Accessed Sep 02 2020.
- 466 19. Austin PC, Stuart EA. Moving towards best practice when using inverse probability of treatment  
467 weighting (IPTW) using the propensity score to estimate causal treatment effects in observational  
468 studies. *Stat Med* 2015; 34:3661-3679.
- 469 20. Sterne JAC, White IR, Carlin JB, et al. Multiple imputation for missing data in epidemiological  
470 and clinical research: potential and pitfalls. *BMJ (Clinical research ed)* 2009; 338: b2393-b.
- 471 21. Group RC, Horby P, Lim WS, et al. Dexamethasone in Hospitalized Patients with Covid-19  
472 Preliminary Report. *N Engl J Med*. 2020. doi: 10.1056/NEJMoa2021436.
- 473 22. Wiersinga WJ, Rhodes A, Cheng AC, et al. Pathophysiology, Transmission, Diagnosis, and  
474 Treatment of Coronavirus Disease 2019 (COVID-19): A Review. *JAMA* 2020. 324:782-793.
- 475
- 476
- 477

478 **Table 1. Baseline characteristics of patients by Qingfei Paidu Tang use**

479

|                                              | No QPT<br>N=6371 | QPT<br>N=2568 | SMD before<br>IPTW | SMD after<br>IPTW |
|----------------------------------------------|------------------|---------------|--------------------|-------------------|
| <b>Demographic</b>                           |                  |               |                    |                   |
| Women                                        | 3401 (53.4)      | 1370 (53.3)   | -0.0007            | 0.0115            |
| Age, years                                   |                  |               | 0.1081             | 0.0263            |
| < 60                                         | 3626 (56.9)      | 1594 (62.1)   |                    |                   |
| 60-70                                        | 1511 (23.7)      | 555 (21.6)    |                    |                   |
| > 70                                         | 1234 (19.4)      | 419 (16.3)    |                    |                   |
| <b>Prior history/Comorbidities</b>           |                  |               |                    |                   |
| Hypertension                                 | 2191 (34.4%)     | 825 (32.1%)   | -0.0481            | 0.0175            |
| Diabetes                                     | 1014 (15.9%)     | 343 (13.4%)   | -0.0724            | 0.0130            |
| Coronary heart disease                       | 475 (7.5%)       | 211 (8.2%)    | 0.0283             | 0.0284            |
| Stroke                                       | 469 (7.4%)       | 140 (5.5%)    | -0.0781            | 0.0602            |
| Chronic kidney disease                       | 159 (2.5%)       | 57 (2.2%)     | -0.0182            | 0.0265            |
| COPD                                         | 116 (1.8%)       | 41 (1.6%)     | -0.0173            | 0.0312            |
| Cancer                                       | 201 (3.2%)       | 84 (3.3%)     | 0.0066             | 0.0190            |
| <b>Clinical characteristics at admission</b> |                  |               |                    |                   |
| SBP, median (IQR), mmHg                      | 130(120, 140)    | 128(120, 140) | -0.0308            | 0.0466            |
| DBP, median (IQR), mmHg                      | 80(74, 89)       | 80(74, 88)    | 0.0256             | 0.0316            |
| HR, median (IQR), breaths per min            | 84(78, 95)       | 84(78, 96)    | 0.0077             | 0.0340            |
| RR >24 breaths per min                       | 592 (9.3%)       | 195 (7.6%)    | -0.0611            | 0.0713            |
| Critical state at admission                  | 274 (4.3%)       | 116 (4.5%)    | 0.0105             | -0.0019           |
| <b>Medication</b>                            |                  |               |                    |                   |
| <b>Antiviral</b>                             |                  |               |                    |                   |
| Arbidol                                      | 3447 (54.1%)     | 1969 (76.7%)  | 0.4884             | 0.2971            |
| Ribavirin                                    | 1150 (18.1%)     | 585 (22.8%)   | 0.1175             | -0.0707           |
| Oseltamivir                                  | 1347 (21.1%)     | 666 (25.9%)   | 0.1131             | -0.0627           |
| Ganciclovir                                  | 323 (5.1%)       | 183 (7.1%)    | 0.0860             | -0.1166           |
| Lopinavir/Ritonavir                          | 777 (12.2%)      | 371 (14.4%)   | 0.0663             | -0.0494           |
| <b>Traditional Chinese medicine</b>          |                  |               |                    |                   |
| Lianhua Qingwen                              | 3172 (49.8%)     | 1563 (60.9%)  | 0.2242             | 0.1008            |
| Xuebijing                                    | 624 (9.8%)       | 503 (19.6%)   | 0.2793             | 0.0284            |
| Diammonium glycyrrhetate                     | 996 (15.6%)      | 315 (12.3%)   | -0.0973            | 0.0253            |

|                        | No QPT<br>N=6371 | QPT<br>N=2568 | SMD before<br>IPTW | SMD after<br>IPTW |
|------------------------|------------------|---------------|--------------------|-------------------|
| <b>Corticosteroids</b> |                  |               |                    |                   |
| Methylprednisolone     | 1251 (19.6%)     | 490 (19.1%)   | -0.0140            | -0.1184           |
| Dexamethasone          | 334 (5.2%)       | 133 (5.2%)    | -0.0029            | -0.0077           |
| <b>Immunomodulator</b> |                  |               |                    |                   |
| Interferon-alpha       | 2242 (35.2%)     | 857 (33.4%)   | -0.0383            | -0.1823           |

Abbreviations: QPT, Qingfei Paidu Tang; IPTW, inverse probability of treatment weighting; SMD, standardized mean difference; IQR, inter-quartile range; HR, heart rate; RR, respiratory rate; COPD: chronic obstructive pulmonary disease

480

481



482 **Table 2. Associations between Qingfei Paidu Tang use and mortality in the crude**  
483 **analysis, multivariable analysis, and propensity-score analyses**

484

| <b>Analysis</b>                                  | <b>Mortality</b> |
|--------------------------------------------------|------------------|
| No. of events/no. of patients at risk (%)        |                  |
| Qingfei Paidu Tang                               | 30 (1.2)         |
| No Qingfei Paidu Tang                            | 304(4.8)         |
| Crude analysis-hazard ratio (95% CI)             | 0.17(0.11-0.26)  |
| Multivariable analysis- hazard ratio (95% CI)    | 0.23(0.15-0.36)  |
| Propensity-score analysis- hazard ratio (95% CI) |                  |
| With inverse probability weighting               | 0.50(0.37-0.66)  |
| With matching                                    | 0.42(0.24-0.74)  |
| Adjusted as a covariant                          | 0.24(0.15-0.37)  |

Abbreviations: 95% CI, 95% confidence interval

485

486

487

488

489 **FIGURE LEGENDS**

490 **Figure 1. Flowchart of the study cohort**

491 COVID-19, coronavirus disease 2019; QPT, Qingfei Paidu Tang

492 **Figure 2. Kaplan–Meier survival curves for in-hospital mortality in inverse**  
493 **probability treatment weighting analysis**

494 QPT, Qingfei Paidu Tang

495 **Figure 3. Hazard ratios of in-hospital mortality across subgroups in inverse**  
496 **probability treatment weighting analysis**

497 HR, hazard ratio; 95% CI, 95% confidence interval.

498

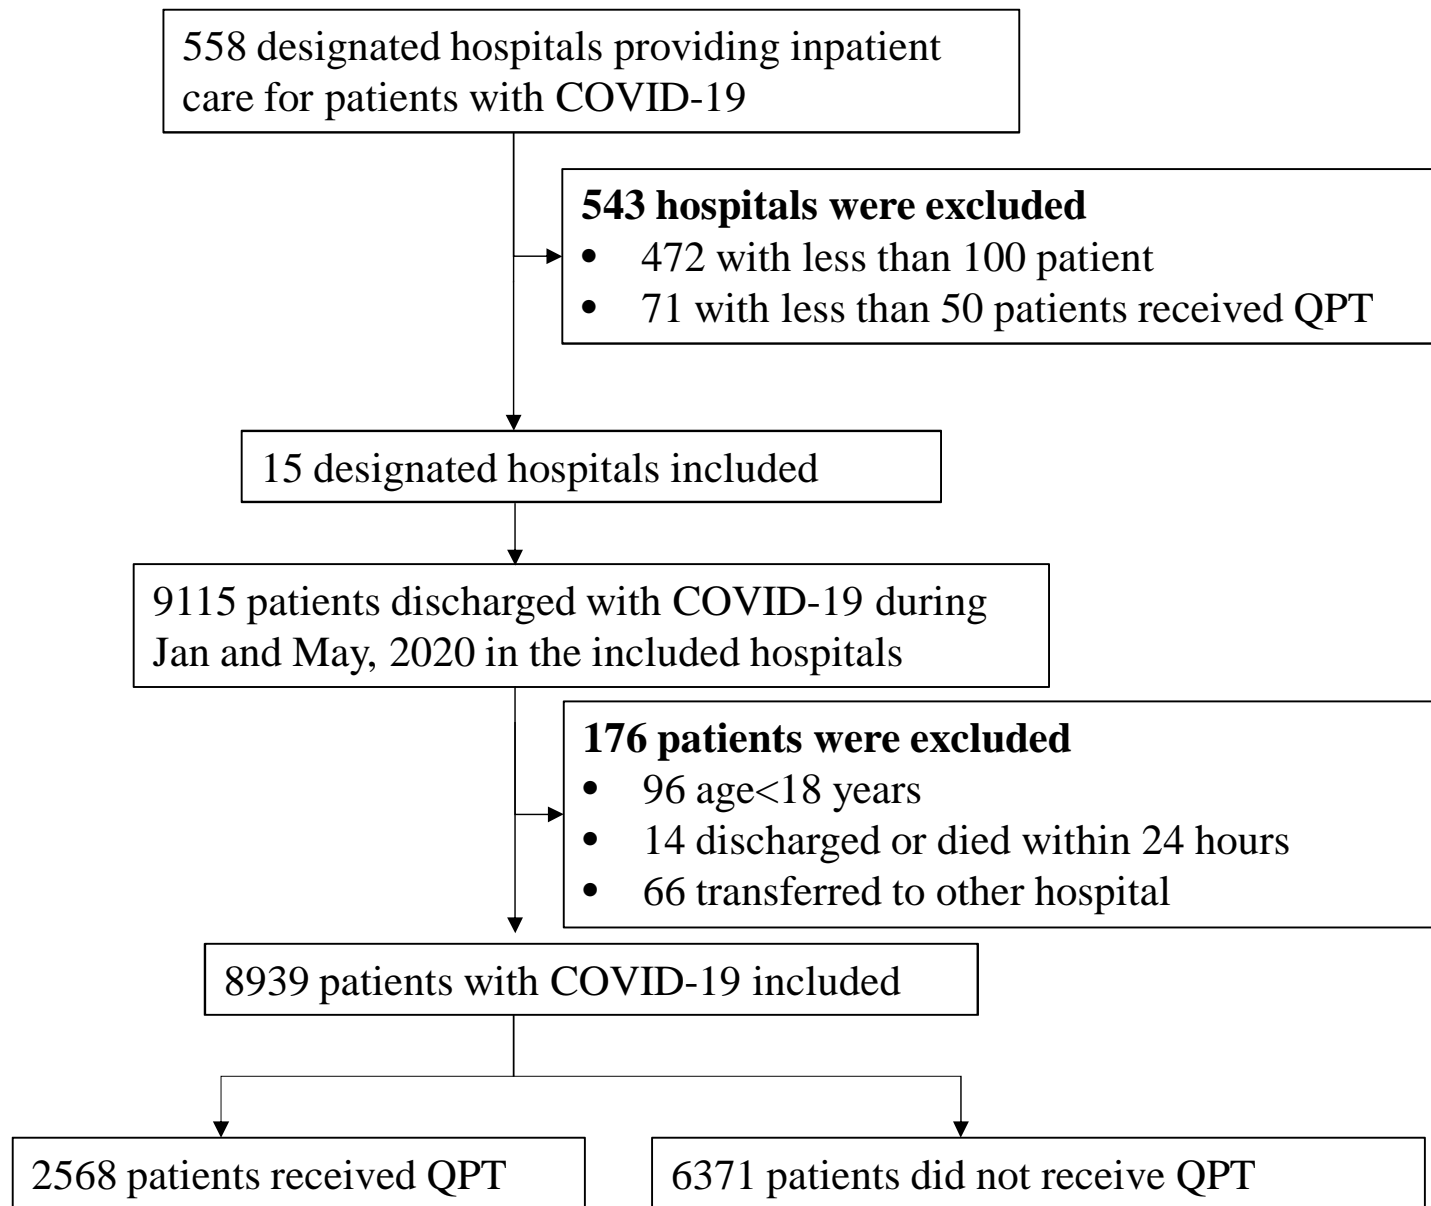

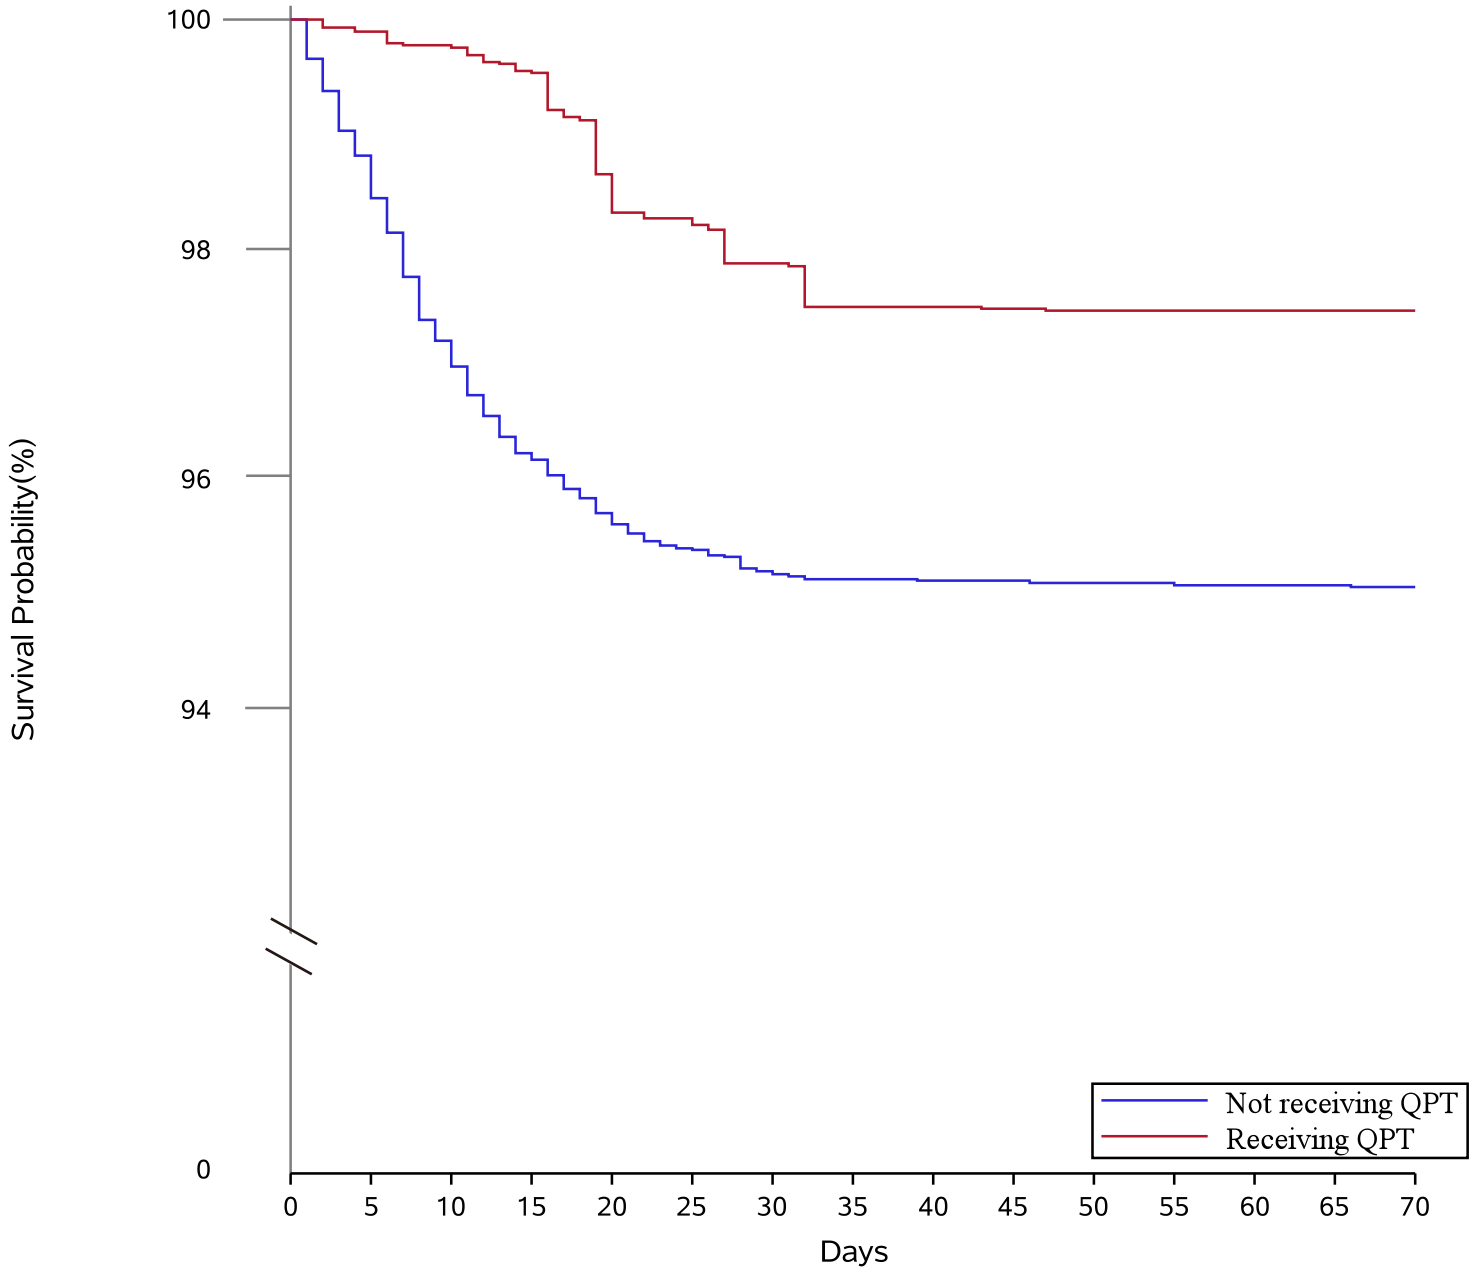

|                   |      |      |      |      |      |      |      |      |      |      |      |      |      |      |      |
|-------------------|------|------|------|------|------|------|------|------|------|------|------|------|------|------|------|
| Not receiving QPT | 6362 | 6286 | 6184 | 6122 | 6088 | 6069 | 6056 | 6052 | 6051 | 6051 | 6050 | 6050 | 6048 | 6048 | 6047 |
| Receiving QPT     | 2583 | 2580 | 2577 | 2571 | 2548 | 2538 | 2528 | 2518 | 2518 | 2518 | 2517 | 2517 | 2517 | 2517 | 2517 |

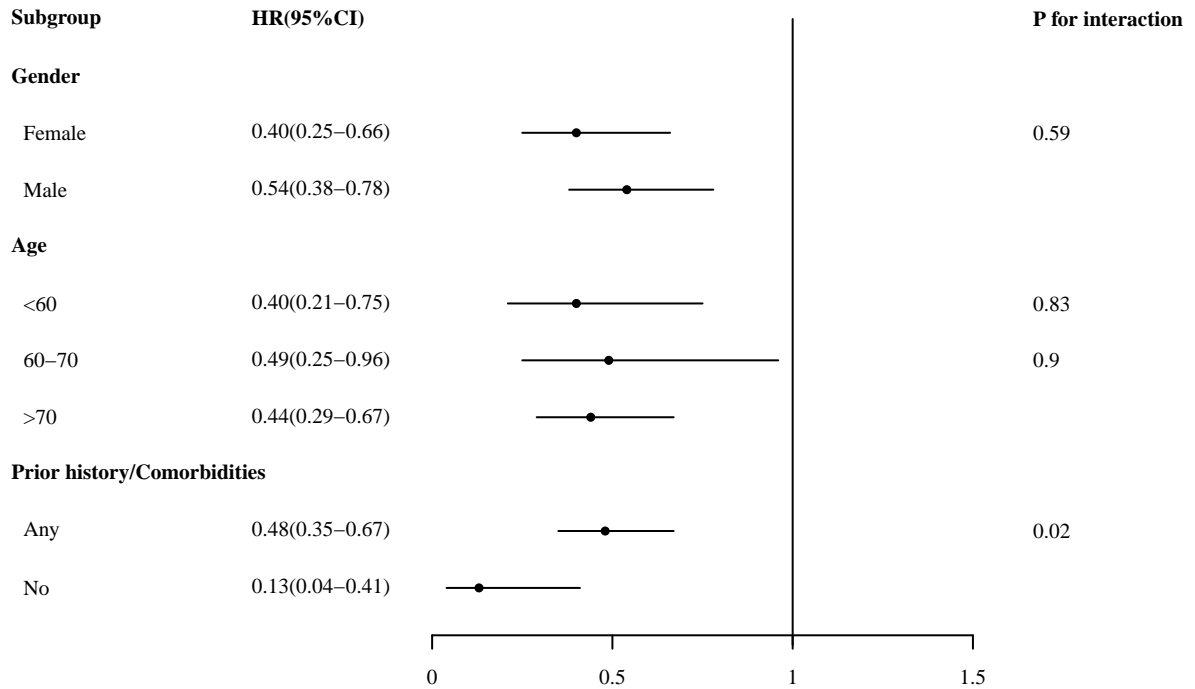

Source: https://www.medrxiv.org/content/10.1101/2020.12.23.20248444v1.full.pdf
